# Supplementary material for: Room to Improve: Predictors of Attendance and Outcomes Within Mindfulness-Enhanced Behavioral Parent Training
Source: Springer Nature journal article supplement (doi:10.1007/s12671-024-02328-3), 2024-04-01
Supplement: MOESM1 [file 26937098]

**Supplementary Table S1**:

*Demographic Characteristics and Statistical Values for Parents who Completed Measures at One (Pre or Post) or Both Time Points (Pre and Post)*

| Demographic Characteristic | Specifier/s | Total Sample  (*n* = 338) | Pre or Post  (*n* = 119) | Pre and Post  (*n* = 219) | Statistical Values*1*  *t* (df) *p, effect size2* | |
| --- | --- | --- | --- | --- | --- | --- |
| Child Gender | Male (%) | 236 (70.4%) | 85 (73.3%) | 151 (68.9%) | 0.68 (1,335) | 0.451, -0.05 |
| Child Age | Mean (*SD*) | 7.1 (2.2) | 7.3 (2.2) | 6.9 (2.2) | -1.33 (331) | 0.183, -0.15 |
| Child Medication | On medication (%) | 68 (25.3%) | 21 (26.3%) | 47 (24.9%) | 0.06 (1, 269) | 0.878, -0.02 |
| Medication Reason | Behaviour/Hyperactivity  Medical  Emotional/Other | 37 (52.1%)  23 (32.4%)  11 (15.5%) | 8 (36.3%)  8 (36.3%)  6 (27.2%) | 29 (59.1%)  15 (30.6%)  5 (10.2%) | 4.53 (2,71) | 0.111, 0.25 |
| Problems Started | Birth  < 2 year old  3-5 year old  5+ | 36 (16.1%)  83 (37.1%)  55 (24.6%)  50 (22.3%) | 11 (18.3%)  19 (31.7%)  14 (23.3%)  16 (26.7%) | 25 (15.2%)  64 (39.0%)  41 (25.0%)  34 (20.7%) | 1.65 (3,224) | 0.649, 0.09 |
| Past Prof. Involved3 | Mean (*SD*) | 2.7 (1.5) | 3.0 (1.4) | 2.6 (1.5) | -2.03 (246) | 0.043*, -0.27 |
| Parent Role4 | Mothers (%) | 223 (66.0%) | 65 (54.6%) | 158 (70.9%) | 10.55 (1,338) | < 0.001***, 0.18 |
| Parent Age | Mean (*SD*) | 39.0 (6.9) | 38.6 (6.9) | 39.1 (6.9) | 0.39 (229) | 0.697, 0.06 |
| Parent Race5 | Australian  Australian + Other  Other | 238 (82.6%)  43 (14.9%)  7 (2.4%) | 74 (85.1%)  11 (12.6%)  2 (2.3%) | 164 (81.6%)  32 (15.9%)  5 (2.5%) | 0.53 (2,288) | 0.833, 0.04 |
| Education Level | School  Certificate/Diploma  Undergraduate  Postgraduate | 23 (14.9%)  104 (45.6%)  49 (21.5%)  41 (18%) | 7 (12.7%)  28 (50.9%)  13 (23.6%)  7 (12.7%) | 27 (15.6%)  76 (43.9%)  36 (20.8%)  34 (19.7%) | 1.95 (3,288) | 0.589, 0.09 |
| Employment Status | Not employed  Part-time  Full-time | 52 (24.5%)  83 (39.2%)  77 (36.3%) | 8 (17.4%)  16 (34.8%)  22 (47.8%) | 44 (26.5%)  67 (40.4%)  55 (33.1%) | 3.65 (2,212) | 0.159, 0.13 |
| Concession Card | Yes  No | 75 (26%)  213 (74%) | 32 (35.2%)  59 (64.8%) | 43 (21.8%)  154 (78.2%) | 5.75 (1,288) | 0.021*, -0.14 |
| Marital Status | Married/Defacto  Separated/Divorced  Other | 240 (85.1%)  22 (7.8%)  20 (7.1%) | 69 (83.1%)  7 (8.4%)  7 (8.4%) | 171 (86.4%)  15 (7.5%)  13 (6.5%) | 0.413 (2,282) | 0.824, 0.04 |
| Family Type | Couple  One parent | 249 (88.6%)  32 (11.4%) | 74 (87.1%)  11 (12.9%) | 175 (89.3%)  21 (10.7%) | 0.29 (1,281) | 0.683, 0.03 |
| Family Income6 | Low  Middle/High | 41 (14.7%)  237 (85.3%) | 19 (22.9%)  64 (77.1%) | 22 (11.3%)  173 (88.7%) | 6.24 (1,278) | 0.012*, -0.15 |
| Family Size | Children - *M* (*SD*) | 2.3 (0.8) | 2.3 (0.8) | 2.3 (0.8) | 0.29 (282) | 0.772, 0.04 |
| Sessions Attend7 | Mean of 8 sessions (*SD*)8 | 6.7 (1.6) | 5.6 (2.2) | 7.2 (0.9) | 9.01 (285) | < 0.001***, 1.15 |
| Attend Status | Mothers attend in team  Fathers attend in team  Mothers attend alone  Fathers attend alone | 101 (29.3%)  90 (26.6%)  121 (36.4%)  26 (7.7%) | 22 (18.5%)  42 (35.3%)  42 (35.3%)  13 (10.9%) | 79 (36.1%)  48 (21.9%)  79 (36.1%)  13 (5.9%) | 15.67 (3,338) | 0.001**, 0.22 |

**p* < 0.05, ***p* < 0.01, ****p* < 0.001; 1 *t*-test for continuous, Chi-square for categorical; 2 effect size Cohen’s *d* for *t*-test, reported using the commonly accepted criteria of small (*d* = 0.2), medium (*d* = 0.5) and large (*d* =.8) (Cohen, 1988), and Phi for Chi-square, using the commonly accepted criteria of small (φ = 0.1), medium (φ = 0.3) and large (φ = 0.5); 3 Past professionals included private psychologist (*n* = 163), general practitioner (*n* = 161), paediatrician (*n* = 116), school counsellor (*n* = 109), psychiatrist (*n* = 39), other (*n* = 35); 4 Parent Role includes biological, step, foster and grandparents; 5 Other race included European 10.4%, Asian 2.8%, American 2.4%.; 6 Defined by Australian Bureau of Statistics (2021), low = < $800 per week, middle/high combined due to bracket changes over 10 years; 7 Sessions Attend includes catch-ups (30 parents attended one catch-up, 6 parents attended two catch-ups); 8 39.7 % parents attended 8/8 sessions, 29.3% attended 7 sessions, 17.1% attended 6 sessions, 5.2% attended 5 sessions, 1.4% attended 4 sessions, 3.5% attended 3 sessions, 2.1% attended 2 sessions, 1.8% attended 1 session). Reproduced with permission from Donovan et al. (2022a).

**Supplementary Table S2**:

*Means, Standard Deviation and t-test Statistical Values Comparing Parents Who Completed Measures at One or Both Time Points*

| **Outcome Variable** | ***n***  Pre/ | **Reliability**  **Coefficient** | **Baseline**  *M* (*SD*) | | **Statistical Values** | |
| --- | --- | --- | --- | --- | --- | --- |
|  | Post | α1 | Pre and Post | Pre Only | *t* (*df*) | *p*, *d* |
| **Child Behaviour** |  |  |  |  |  |  |
| Intensity | 286/ 262 | 0.91 | 151.49 (26.21) | 160.79 (35.45) | -2.38 (284) | 0.018*, -0.32 |
| Problem | 276/ 252 | 0.88 | 18.25 (7.05) | 19.82 (8.73) | -1.55 (275) | 0.122, -0.21 |
| **Parent Wellbeing** | 281/ 261 |  |  |  |  |  |
| Depression |  | 0.90 | 3.60 (3.90) | 4.40 (4.85) | -1.41 (279) | 0.161, -0.19 |
| Anxiety |  | 0.84 | 2.11 (3.04) | 2.53 (3.90) | -0.92 (279) | 0.358, -0.13 |
| Stress |  | 0.87 | 7.01 (4.47) | 7.29 (4.83) | -0.44 (279) | 0.657, -0.06 |
| Total |  | 0.94 | 12.73 (9.92) | 14.22 (12.18) | -1.03 (279) | 0.302, -0.14 |
| **Parenting Approach** | 286/ 260 |  |  |  |  |  |
| Over-reactivity |  | 0.72 | 3.71 (0.86) | 3.62 (0.89) | 0.83 (285) | 0.409, 0.11 |
| Laxness |  | 0.82 | 2.96 (0.90) | 3.03 (0.91) | -0.61 (285) | 0.546, -0.08 |
| Verbosity |  | 0.55 | 4.09 (0.78) | 4.10 (0.81) | -0.05 (285) | 0.957, -0.01 |
| Total |  | 0.81 | 3.51 (0.56) | 3.50 (0.58) | 0.18 (285) | 0.430, -0.24 |
| **Mindful Parent**ing 2 | 240/ 223 |  |  |  |  |  |
| LFA |  | 0.83 | 3.29 (0.63) | 3.39 (0.66) | -1.05 (238) | 0.297, -0.16 |
| EAS |  | 0.67 | 3.10 (0.54) | 3.09 (0.56) | 0.02 (238) | 0.987, 0.01 |
| EAC |  | 0.73 | 3.56 (0. 65) | 3.43 (0.79) | 1.27 (238) | 0.206, 0.19 |
| ENRP |  | 0.73 | 3.14 (0.57) | 3.16 (0.61) | -0.18 (238) | 0.859, -0.03 |
| NJAPF |  | 0.78 | 2.70 (0.68) | 2.74 (0.62) | -0.38 (238) | 0.705, -0.06 |
| CC |  | 0.81 | 3.95 (0.51) | 3.94 (0.50) | 0.14 (238) | 0.444, 0.02 |
| Total |  | 0.88 | 3.32 (0.37) | 3.33 (0.39) | -0.17 (238) | 0.867, -0.03 |

**p* < 0.05; 1 Reliability statistics reported as Cronbach’s alphas, averaged across pre and post - Excellent (> 0.9), Good (> 0.8), Acceptable (> 0.7), Questionable (> 0.6), Poor (> 0.5), and Unacceptable (< 0.5); 2 LFA = Listening with Full Attention; NJAPF = Non-Judgmental Acceptance of Parenting Function; EAC = Emotional Awareness of Child; EAS = Emotional Awareness of Self; CC = Compassion for Child; ENRP = Emotional Non-Reactivity in Parenting. Reproduced with permission from Donovan et al. (2022a).

**Supplementary Table S3:** *Correlations Between PS* a *and IMP* b *Subscales and Change Scores*

| Variable | Child Behav.  (T1) (Δ) | | PS and IMP Baseline (T1) | | | | | | | | | | PS and IMP Change Scores (Δ) | | | | | | | | | | | |
| --- | --- | --- | --- | --- | --- | --- | --- | --- | --- | --- | --- | --- | --- | --- | --- | --- | --- | --- | --- | --- | --- | --- | --- | --- |
|  | 1 | 2 |  | 3 | 4 | 5 | 6 | 7 | 8 | 9 | 10 | 11 |  |  | 12 | 13 | 14 | 15 | 16 | 17 | 18 | 19 | 20 |
| 1. ΔECBI_Int. | 1 | 0.59  *** |  | -0.04 | -0.10 | -0.03 | 0.11 | 0.01 | 0.00 | -.003 | 0.09 | 0.00 |  |  | 0.29  *** | 0.22  *** | 0.22  ** | -0.29  *** | -0.21  ** | -0.28  *** | -0.15  * | -0.16  * | -0.20  ** |
| 1. ΔECBI_Prob. | 0.59  *** | 1 |  | -0.02 | -0.06 | 0.01 | -0.03 | -0.04 | -0.05 | -0.03 | 0.01 | -0.00 |  |  | 0.30  *** | 0.14  * | 0.24  *** | -0.20  ** | -0.15 | -0.15 | -0.12 | -0.12 | -0.11 |
| 3. T1.PS_OR a | -0.04 | -0.02 |  | 1 | 0.17  ** | 0.26  *** | -0.50  *** | -0.23  *** | -0.55  *** | -0.33  *** | -0.11 | -0.40  *** |  |  | -0.45  *** | -0.04 | -0.05 | 0.19  ** | 0.08 | 0.31  *** | 0.14 | 0.03 | 0.17  * |
| 4. T1.PS_Lax | -0.10 | -0.06 |  | 0.17  ** | 1 | 0.38  *** | -0.07 | -0.20  ** | -0.15  * | -0.21  ** | -0.15  * | -0.03 |  |  | -0.09 | -0.60  *** | -0.21  ** | -0.05 | 0.19  * | 0.12 | 0.01 | 0.07 | 0.01 |
| 5. T1.PS_Verb | -0.03 | 0.01 |  | 0.26  *** | 0.38  *** | 1 | -0.04 | -0.04 | -0.17  ** | -0.10 | 0.02 | -0.03 |  |  | -0.19  ** | -0.31  *** | -0.53  *** | -0.03 | 0.11 | 0.11 | 0.11 | -0.04 | 0.08 |
| 6. T1.IMP_EAS b | 0.11 | -0.03 |  | -0.50  *** | -0.07 | -0.04 | 1 | 0.16  * | 0.50  *** | 0.26  *** | 0.33  *** | 0.50  *** |  |  | 0.25  *** | -0.05 | -.007 | -0.61  *** | -0.03 | -0.30  *** | -0.07 | -0.19  ** | -0.26  *** |
| 7. T1.IMP_NJAPJ | 0.01 | -0.04 |  | -0.23  *** | -0.20  ** | -0.04 | 0.16  * | 1 | 0.33  *** | 0.25  *** | 0.18  ** | 0.12 |  |  | 0.01 | 0.10 | 0.01 | 0.09 | -0.47  *** | -0.03 | -0.10 | -0.15  * | -0.08 |
| 8. T1.IMP_ENRP | 0.00 | -0.05 |  | -0.55  *** | -0.15  * | -0.17  ** | 0.50  *** | 0.33  *** | 1 | 0.50  *** | 0.30  *** | 0.38  *** |  |  | 0.24  ** | 0.03 | -0.04 | -0.15  * | -0.14 | -0.53  *** | -0.19  * | -0.10 | -0.16  * |
| 9. T1.IMP_LFA | -0.03 | -0.03 |  | -0.33  *** | -0.21  ** | -0.10 | 0.26  *** | 0.25  *** | 0.50  *** | 1 | 0.23  *** | 0.46  *** |  |  | 0.05 | 0.04 | 0.08 | 0.00 | -0.18  * | -0.26  *** | -0.66  *** | -0.12 | -0.09 |
| 10. T1.IMP_EAC | 0.09 | 0.01 |  | -0.11 | -0.15  * | 0.02 | 0.33  *** | 0.18  ** | 0.30  ** | 0.23  *** | 1 | 0.42  *** |  |  | -0.00 | 0.01 | -0.04 | -0.15 * | -0.01 | -0.13 | -0.06 | -0.49  *** | -0.24  ** |
| 11. T1.IMP_CC | 0.00 | 0.00 |  | -0.40  *** | -0.03 | -0.03 | 0.50  *** | 0.12 | 0.38  *** | 0.46  *** | 0.42  *** | 1 |  |  | 0.08 | -0.14 | -0.09 | -0.20  ** | -0.06 | -0.24  ** | -0.24  ** | -0.18  * | -0.53  *** |
| 12. ΔPS_OR | 0.29  *** | 0.30  *** |  | -0.45  *** | -0.09 | -0.19  ** | 0.25  *** | 0.01 | 0.24 ** | 0.05 | -0.00 | 0.08 |  |  | 1 | 0.45  *** | 0.52  *** | -0.50  *** | -0.34  *** | -0.55  *** | -0.27  *** | -0.21 ** | -0.28  *** |
| 13. ΔPS_Lax | 0.22  ** | 0.14  * |  | -0.04 | -0.60  *** | -0.31  *** | -0.05 | 0.10 | 0.03 | 0.04 | 0.01 | -0.14 |  |  | 0.45  *** | 1 | 0.55  *** | -0.13 | -0.34  *** | -0.22  ** | -0.21 ** | -0.19  * | -0.17  * |
| 14. ΔPS_Verb | 0.22  ** | 0.24  *** |  | -0.05 | -0.21  ** | -0.53  *** | -0.01 | 0.01 | -0.04 | 0.08 | -0.04 | -0.09 |  |  | 0.52  *** | 0.55  *** | 1 | -0.27  *** | -0.40  *** | -0.26  *** | -0.32  *** | -0.27  *** | -0.17  * |
| 15. ΔIMP_EAS | -0.29  *** | -0.20  ** |  | 0.19  ** | -0.05 | -0.03 | -0.61  *** | 0.09 | -0.15  * | 0.00 | -0.15  * | -0.20  ** |  |  | -0.50  *** | -0.13 | -0.27  *** | 1 | 0.29  *** | 0.52  *** | 0.32  *** | 0.27  *** | 0.38  *** |
| 16. ΔIMP_NJAPJ | -0.21  ** | -0.15 |  | 0.08 | 0.19  * | 0.11 | -0.03 | -0.47  *** | -0.14 | -0.02  * | -0.06 | -0.06 |  |  | -0.34  *** | -0.34  *** | -0.40  *** | 0.29  *** | 1 | 0.41  *** | 0.39  *** | 0.25  *** | 0.35  *** |
| 17. ΔIMP_ENRP | -0.28  *** | -0.15 |  | 0.31  *** | 0.12 | 0.11 | -0.30  *** | -0.03 | -0.53  *** | -0.26  *** | -0.13 | -0.24  ** |  |  | -0.55  *** | -0.22  ** | -0.26  *** | 0.52  *** | 0.41  *** | 1 | 0.41  *** | 0.30  *** | 0.38 *** |
| 18. ΔIMP_LFA | -0.15  * | -0.12 |  | 0.14 | 0.10 | 0.11 | -0.07 | -0.10 | -0.19  * | -0.66  *** | -0.06 | -0.24  ** |  |  | -0.27  *** | -0.21  ** | -0.32  *** | 0.32  *** | 0.39  *** | 0.41  *** | 1 | 0.24  *** | 0.30  *** |
| 19. ΔIMP_EAC | -0.16  * | -0.12 |  | 0.03 | 0.07 | -0.04 | -0.19  ** | -0.15  * | -0.10 | -0.12 | -0.49  *** | -0.18  * |  |  | -0.21  ** | -0.19  * | -0.27  *** | 0.27  *** | 0.25  *** | 0.30  *** | 0.24  ** | 1 | 0.37  *** |
| 20. ΔIMP_CC | -0.20  ** | -0.11 |  | 0.17  * | 0.01 | 0.08 | -0.26  *** | -0.08 | -0.16  * | -0.09 | -0.24  ** | -0.53  *** |  |  | -0.28  *** | -0.17  * | -0.17  * | 0.38  *** | 0.35  *** | 0.38  *** | 0.30  *** | 0.37  *** | 1 |

e

| *** Correlation is significant at < 0.01 level (two-tailed), ** Correlation is significant at < 0.01 level (two-tailed), * Correlation is significant at < 0.05 level (two-tailed); a Parenting Scale (PS): OR = Over-reactivity, Lax = Laxness, Verb = Verbosity; b Interpersonal Mindfulness in Parenting (IMP):LFA = Listening with Full Attention; NJAPF = Non-Judgmental Acceptance of Parenting Function; EAC = Emotional Awareness of Child; EAS = Emotional Awareness of Self; CC = Compassion for Child; ENRP = Emotional Non-Reactivity in Parenting |
| --- |
